# Supplementary material
Source: PubMed Central journal article supplement (PMC3127535)
Supplement: supp_mol.111.071308_Supplemental_Table_1.pdf [file supp_mol.111.071308_Supplemental_Table_1.pdf]

Abelson family tyrosine kinases regulate the function of nicotinic acetylcholine receptors and nicotinic synapses on autonomic neurons.

Selwyn S. Jayakar & Joseph F. Margiotta

Molecular Pharmacology

Supplemental Table 1. STI571 fails to alter  $\alpha 3^*$ - or  $\alpha 7$ -nAChR distribution on E14 CG neurons

|                 | $\alpha 3^*$ -nAChR Labeling     |                                        |                                      |                                      | $\alpha 7$ -nAChR Labeling       |                                        |                                      |                                      |
|-----------------|----------------------------------|----------------------------------------|--------------------------------------|--------------------------------------|----------------------------------|----------------------------------------|--------------------------------------|--------------------------------------|
|                 | Cluster Size ( $\mu\text{m}^2$ ) | Cluster Density ( $\mu\text{m}^{-2}$ ) | Cluster Intensity ( $\Delta F/F_b$ ) | Overall Intensity ( $\Delta F/F_b$ ) | Cluster Size ( $\mu\text{m}^2$ ) | Cluster Density ( $\mu\text{m}^{-2}$ ) | Cluster Intensity ( $\Delta F/F_b$ ) | Overall Intensity ( $\Delta F/F_b$ ) |
| Control (n = 8) | 0.21<br>$\pm 0.03$               | 0.16<br>$\pm 0.02$                     | 48.5<br>$\pm 7.8$                    | 3.8<br>$\pm 0.8$                     | 0.76<br>$\pm 0.21$               | 0.05<br>$\pm 0.01$                     | 23.7<br>$\pm 0.7$                    | 4.4<br>$\pm 0.7$                     |
| STI571 (n = 8)  | 0.16<br>$\pm 0.03$               | 0.12<br>$\pm 0.03$                     | 44.1<br>$\pm 4.2$                    | 3.5<br>$\pm 1.0$                     | 1.29<br>$\pm 0.18$               | 0.03<br>$\pm 0.01$                     | 25.2<br>$\pm 0.4$                    | 3.9<br>$\pm 0.6$                     |
| $p =$           | 0.2582                           | 0.2890                                 | 0.6302                               | 0.8184                               | 0.0776                           | 0.1792                                 | 0.0897                               | 0.5968                               |

Analysis of confocal images from freshly dissociated E14 CG neurons immunolabeled with mAb35 or Alexa488 coupled  $\alpha$ Bgt to detect  $\alpha 3^*$ - or  $\alpha 7$ -nAChRs, respectively. Analysis of *en-face* confocal sections was conducted as described for  $\alpha 3^*$ -nAChR clusters in the legend for Table 3. STI571 was applied at 10  $\mu\text{M}$  for 1h and results compared with those from sham treated controls in the same experiments.
